# Supplementary material for: Colorimetric detection of ozone in aqueous solution and imaging in living cells using a novel hemicyanine dye
Source: Royal Society of Chemistry journal article supplement (doi:10.1039/d3ay00381g), 2023-01-01
Supplement: d3ay00381g1.pdf [file d3ay00381g1.pdf]

## Supplementary Information

### **Colorimetric detection of ozone in aqueous solution and imaging in living cells using a novel hemicyanine dye**

Xia Gao<sup>a</sup>, Guo Yu<sup>b</sup>, Xuehan Liu<sup>a</sup>, Yinlan Xu<sup>a</sup>, Pengbo Zhang<sup>\*a</sup> and Weidong Wu<sup>\*a</sup>

<sup>a</sup>School of Public Health, Xinxiang Medical University, Xinxiang, 453003, PR China;

<sup>b</sup>Xinxiang Center for Disease Control and Prevention, Xinxiang 453003, PR China;

\* Corresponding author.

E-mail: [wdwu2013@126.com](mailto:wdwu2013@126.com) (Weidong Wu)

[zpbxxmu@xxmu.edu.cn](mailto:zpbxxmu@xxmu.edu.cn) (Pengbo Zhang)

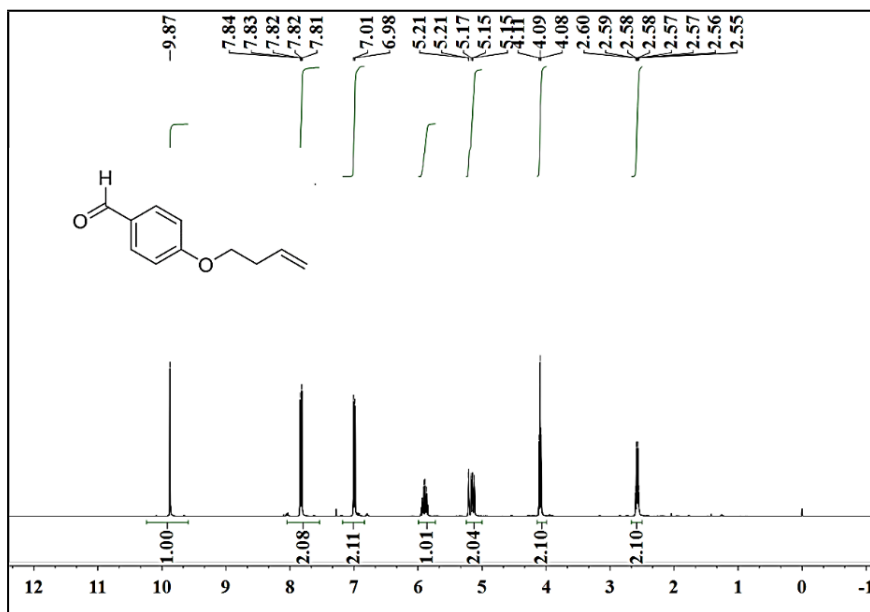

Fig.S<sub>1</sub> <sup>1</sup>H NMR spectroscopy of compound 1(CDCl<sub>3</sub>).

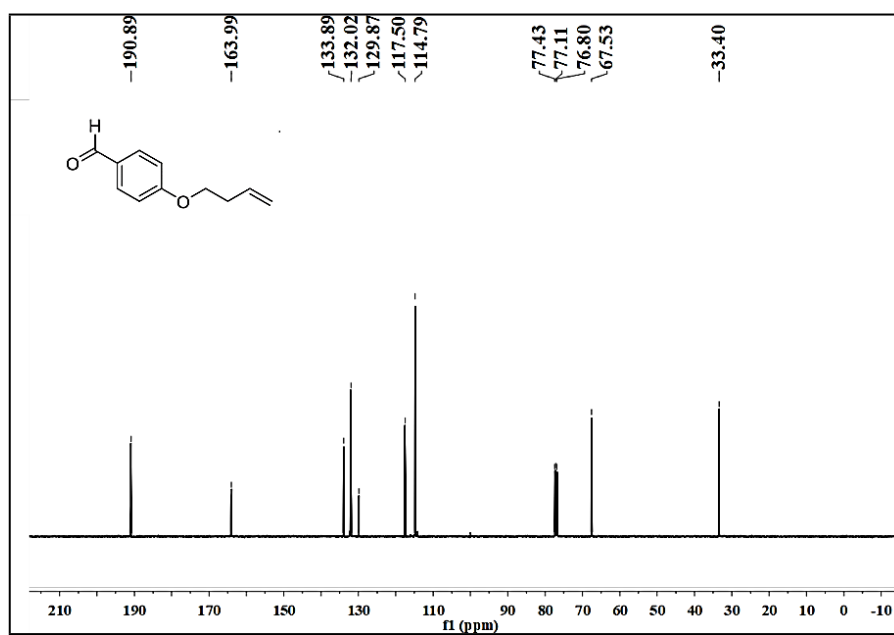

Fig.S<sub>2</sub> <sup>13</sup>C NMR spectroscopy of compound 1(CDCl<sub>3</sub>).

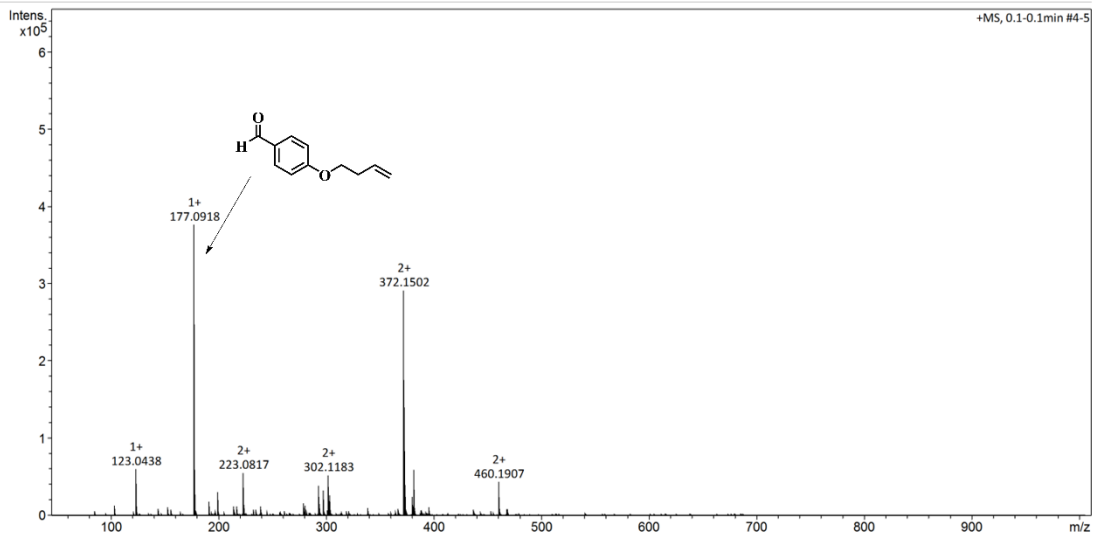

Fig.S<sub>3</sub> MS spectroscopy of compound 1 in shem1.

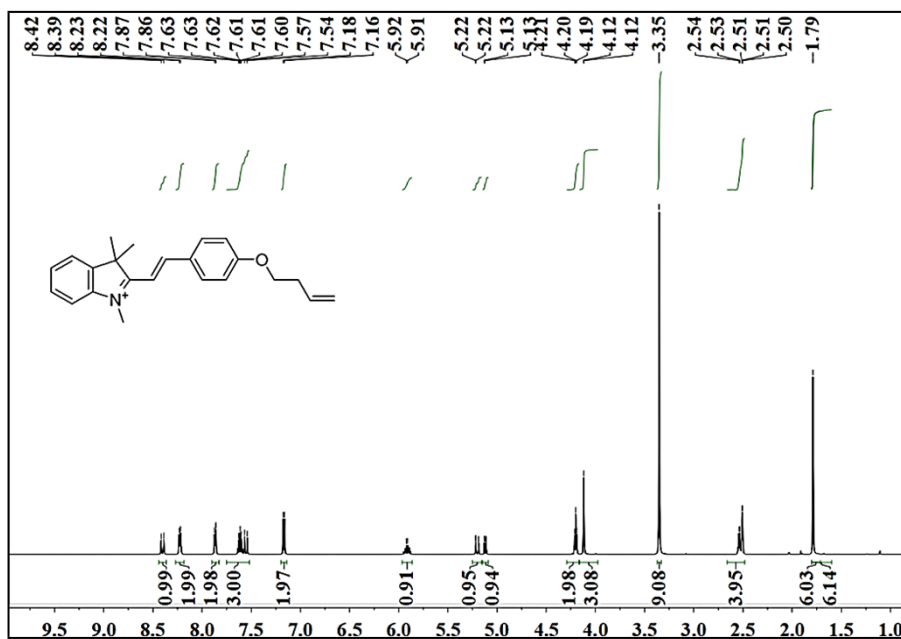

Fig.S<sub>4</sub> <sup>1</sup>H NMR spectroscopy of the probe HCB (DMSO) .

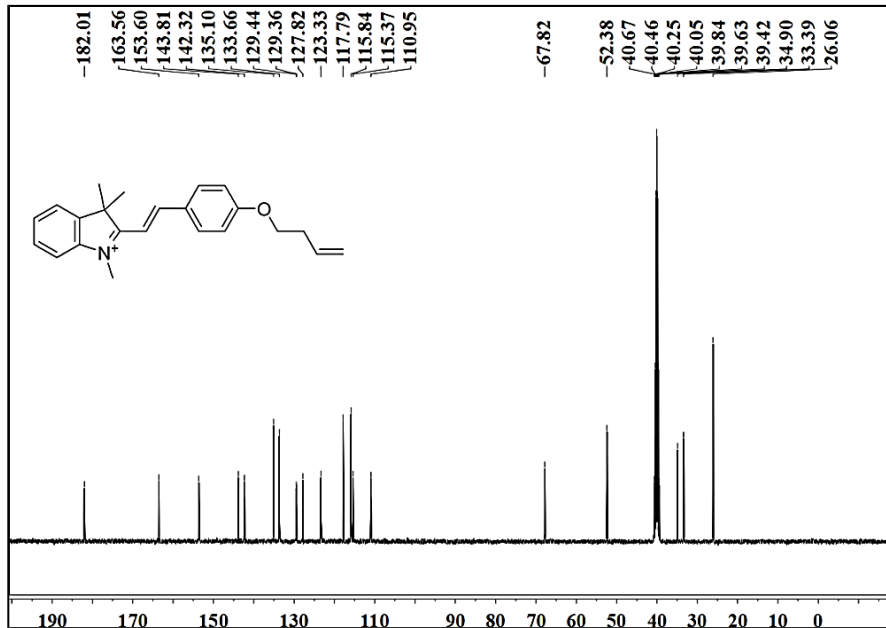

Fig.S<sub>5</sub> <sup>13</sup>C NMR spectroscopy of the probe HCB (DMSO) .

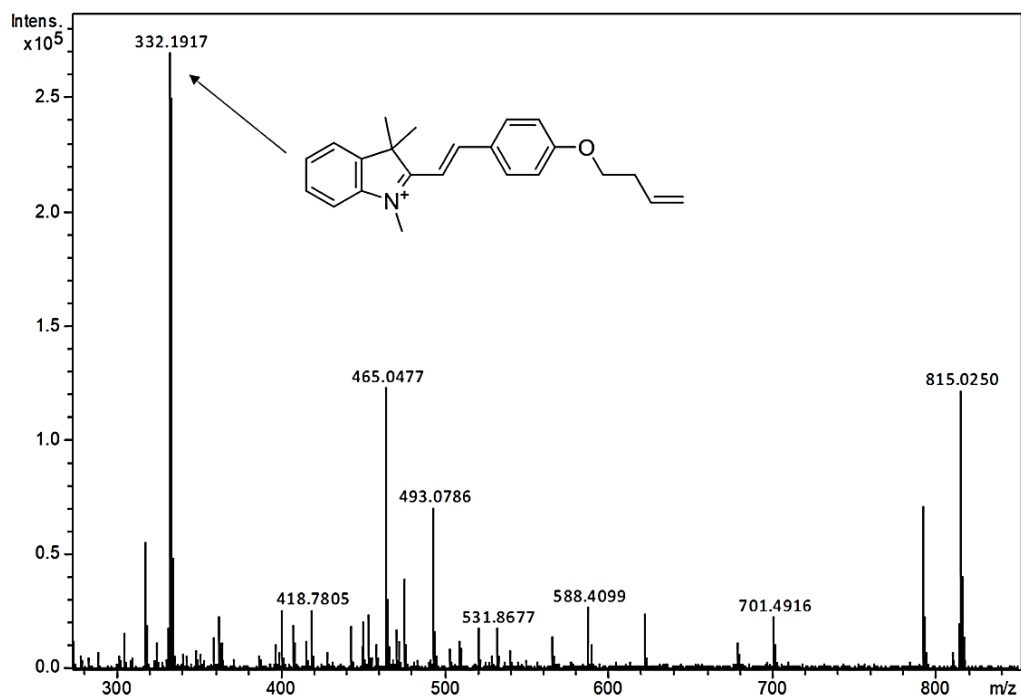

Fig.S<sub>6</sub> MS spectroscopy of the probe HCB.

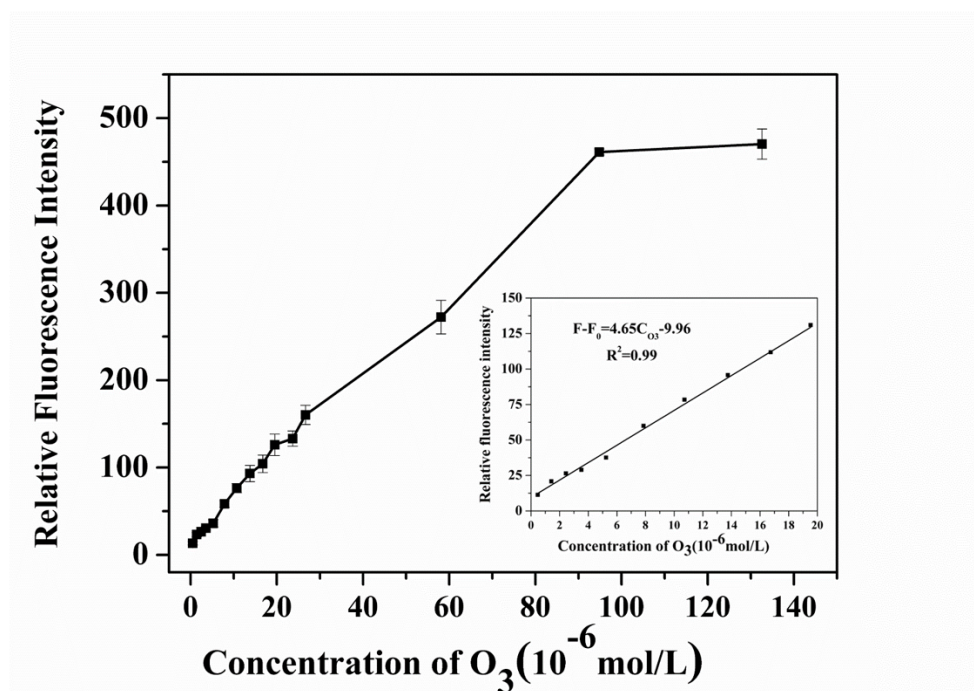

**Fig.S7 The fluorescence titration curves and calibration graphs for spectrophotometric determination of  $O_3$  in the simulated physiological media.** ( $[HCB] = 5.00 \times 10^{-5}$  mol/L,  $[HCO_3^-] = 1.00 \times 10^{-3}$  mol/L,  $[HPO_4^{2-}] = 2.00 \times 10^{-1}$  mol/L,  $[H_2PO_4^-] = 2.00 \times 10^{-1}$  mol/L,  $[Na^+] = 1.00 \times 10^{-3}$  mol/L,  $[K^+] = 1.00 \times 10^{-3}$  mol/L,  $[Ca^{2+}] = 5.00 \times 10^{-4}$  mol/L,  $[Mg^{2+}] = 5.00 \times 10^{-4}$  mol/L,  $[Cl^-] = 2.00 \times 10^{-3}$  mol/L, pH=7.40 PBS buffer, response at  $37^\circ C$  for 40 min) .

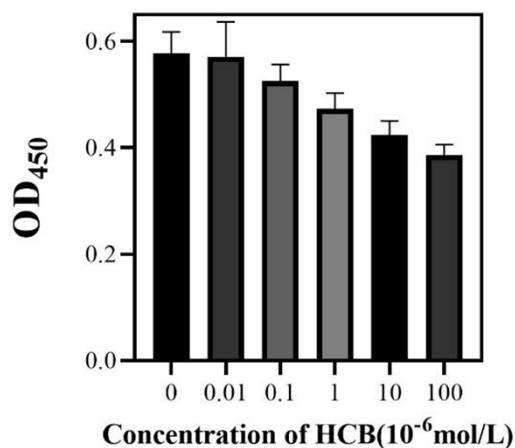

**Fig.S8 Results of the toxicity of HCB to RAW264.7 cells determined by CCK-8 method.**

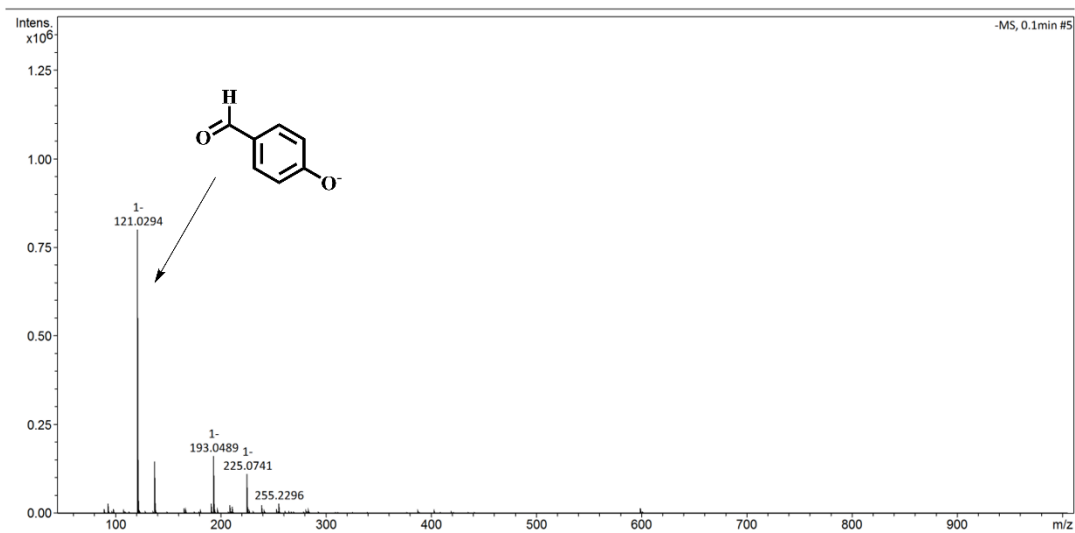

**Fig.S<sub>9</sub>** MS spectroscopy of compound 1(sheme1)-O<sub>3</sub>.

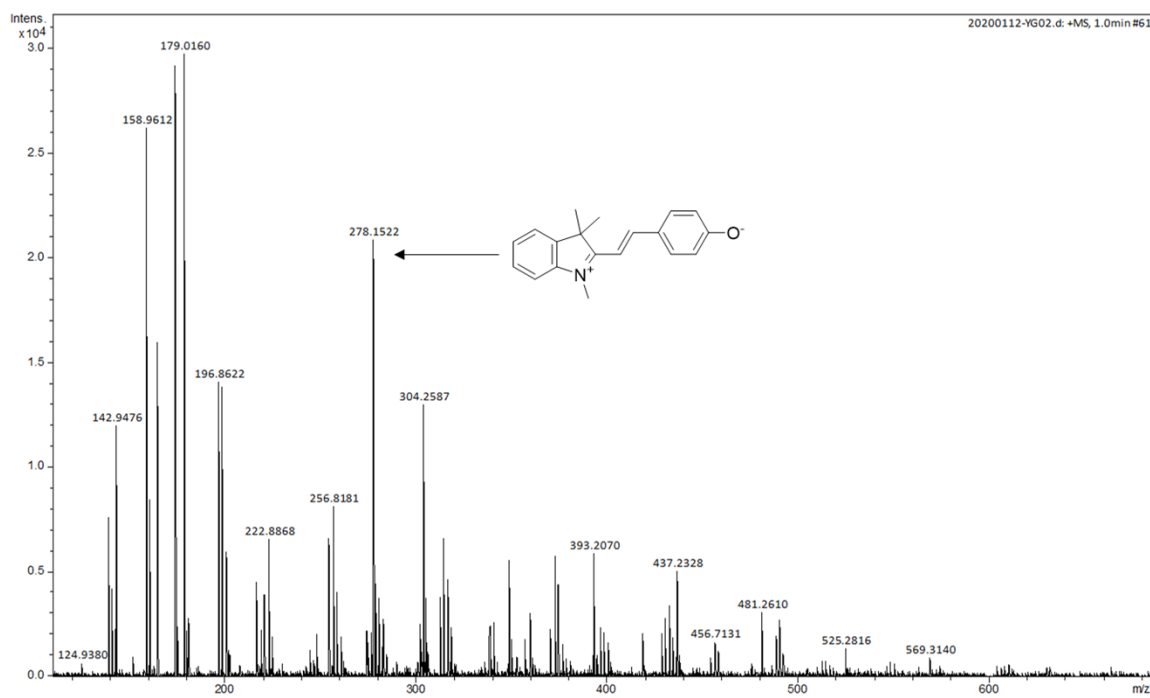

**Fig.S<sub>10</sub>** MS spectroscopy of HCB-O<sub>3</sub>.

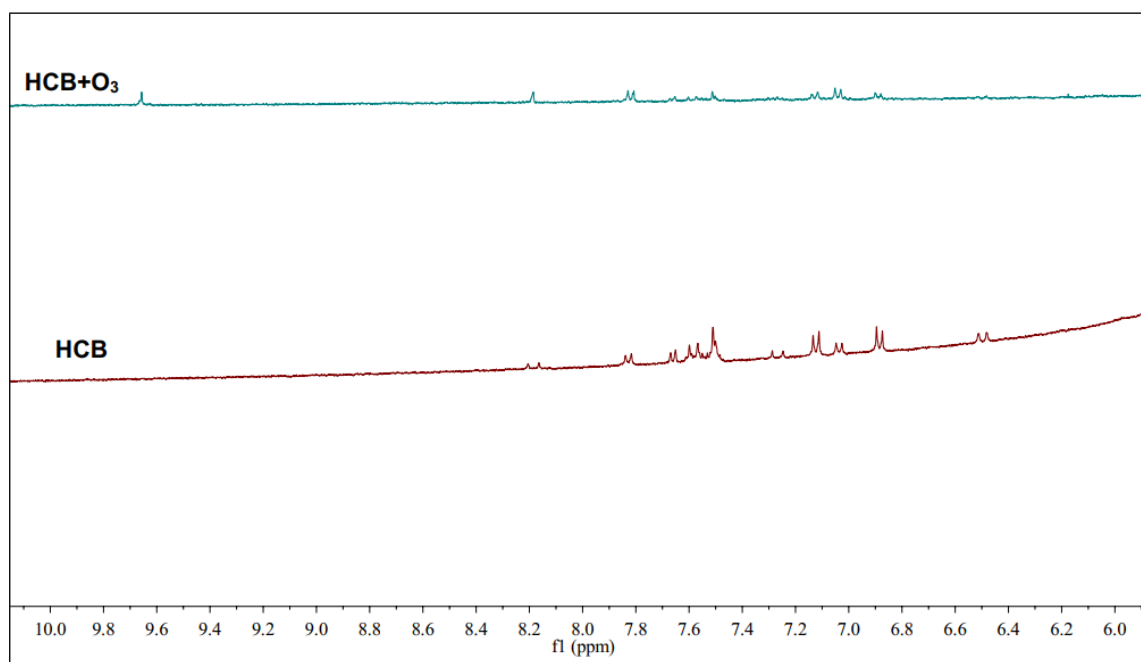

**Fig.S<sub>11</sub>**  $^1\text{H}$  NMR spectra of probes HCB in DMSO-d<sub>6</sub> and D<sub>2</sub>O before and after the addition of O<sub>3</sub>.
